# Supplementary material
Source: PubMed Central journal article supplement (PMC3020101)
Supplement: NIHMS233762-supplement-1.pdf [file NIHMS233762-supplement-1.pdf]

- 1 Wilson, I.W., Schiff, C.L., Hughes, D.E. & Somerville, S.C. (2001) Quantitative trait loci analysis of  
2 powdery mildew disease resistance in the *Arabidopsis thaliana* accession Kashmir-1.  
3 *Genetics*, **158**, 1301-1309.
- 4 Wolfe, M.S. (1985) The current status and prospects of multiline cultivars and variety mixtures for  
5 disease resistance. *Annual Review of Phytopathology*, **23**, 251-273.
- 6 Woolhouse, M.E.J., Webster, J.P., Domingo, E., Charlesworth, B. & Levin, B.R. (2002) Biological  
7 and biomedical implications of the co-evolution of pathogens and their hosts. *Nature Genetics*,  
8 **32**, 569-557.
- 9 Xiao, S.Y., Ellwood, S., Calis, O., Patrick, E., Li, T., Coleman, M. & Turner, J.G. (2001) Broad-  
10 spectrum mildew resistance in *Arabidopsis thaliana* mediated by RPW8. *Science*, **291**, 118-  
11 120.
- 12 Xiao, S.Y., Ellwood, S., Findlay, K., Oliver, R.P. & Turner, J.G. (1997) Characterization of three loci  
13 controlling resistance of *Arabidopsis thaliana* accessions Ms-0 to two powdery mildew  
14 diseases. *Plant Journal*, **12**, 757-768.
- 15 Yamamoto, E., Takashi, T., Morinaka, Y., Lin, S., Wu, J., Matsumoto, T., Kitano, H., Matsuoka, M.  
16 & Ashikari, M. (2010) Gain of deleterious function causes an autoimmune response and  
17 Bateson-Dobzhansky-Muller incompatibility in rice. *Molecular Genetics and Genomics*, **283**,  
18 305-315.
- 19 Zhu, Y., Chen, H., Fan, J., Wang, Y., Li, Y., Chen, J., Fan, J., Yang, S., Hus, I., Leung, H., Mew,  
20 T.W., Teng, P.S., Wang, Z. & Mundt, C.C. (2000) Genetic diversity and disease control in  
21 rice. *Nature*, **406**, 718-722.

22

### 23 **Supporting Information**

24 Additional supporting information may be found in the online version of this article:

25 Table S1. Summary of studies that were used for analysis of how host and pathogen life history  
26 features may affect host resistance.

- 1 Table S2. ANOVA results for how life history and origin of pathogen affect host population
- 2 resistance.
